# Supplementary material for: Evaluation of the dispersion properties of graphene oxide/cetyltrimethylammonium bromide for application in nanocomposite materials
Source: Royal Society of Chemistry journal article supplement (doi:10.1039/d3ra04689c), 2024-01-01
Supplement: d3ra04689c1.pdf [file d3ra04689c1.pdf]

## Evaluation of the dispersion properties of graphene oxide/cetyltrimethylammonium bromide for application in nanocomposite materials

Angela Sánchez-Cepeda,<sup>\*a</sup> E. Cedeño,<sup>b</sup> E. Marín,<sup>b</sup> M. Carolina Pazos,<sup>c</sup> Silva-Cote Ingrid,<sup>d</sup> †Efrén de Jesús Muñoz,<sup>a</sup> and Ricardo Vera-Graziano<sup>e</sup>

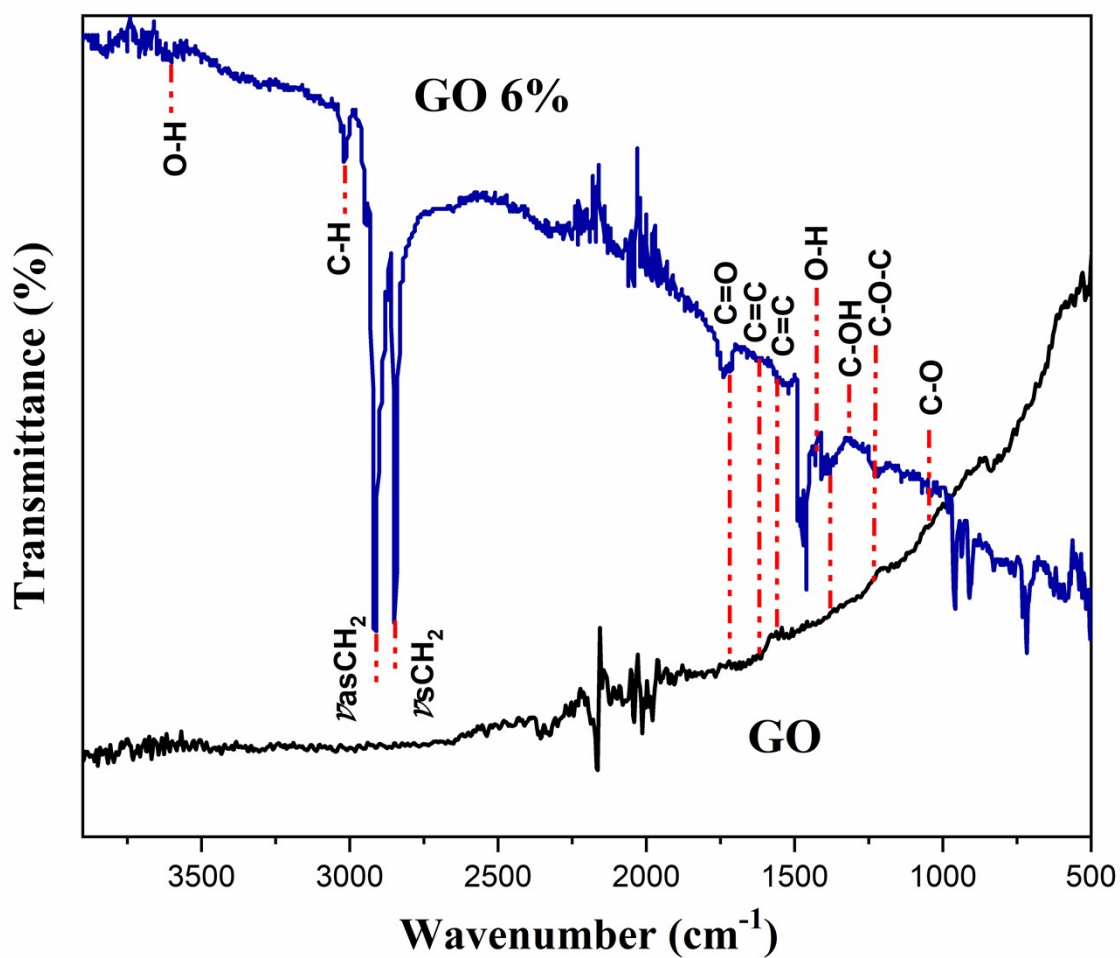

Figure S1. FTIR spectra of pure GO and GO 6%

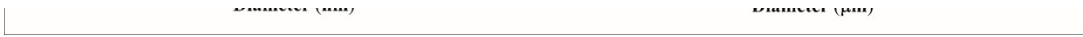

**Figure S2.** Size distribution histograms for SEM images: a) pure GO, b) GO 4%, c) GO 6% and d) GO

4.2%
